# Supplementary material for: A Comparative Analysis of COVID-19 Response Measures and Their Impact on Mortality Rate
Source: MDPI journal article supplement (doi:10.3390/covid4020012), 2024-01-24
Supplement: s1 [file s1]

Archive with 2 entries (2 files):
- covid-2810826-supplementary.pdf
- supplementTables.xlsx
