# Supplementary material for: A Comparative Analysis of COVID-19 Response Measures and Their Impact on Mortality Rate
Source: MDPI journal article supplement (doi:10.3390/covid4020012), 2024-01-24
Supplement: s1 [file s1 › covid-2810826-supplementary.pdf]

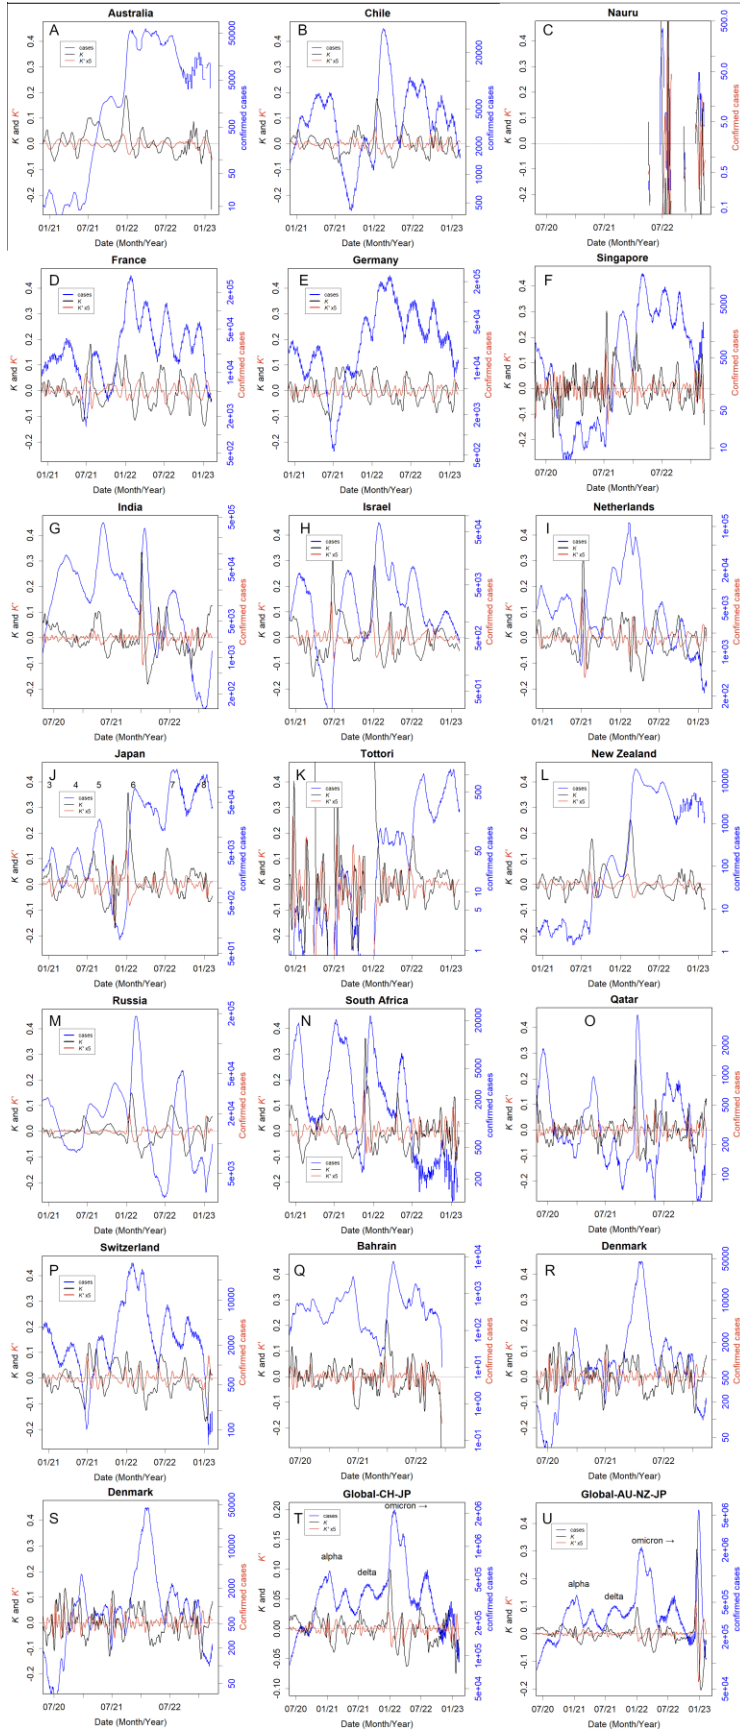

Fig. S1: Confirmed cases (blue), K (black), and K' (red). (A) Australia, (B) Chile, (C) Nauru, (D) France, (E) Germany, (F) Singapore, (G), India, (H) Israel, (I) Netherland, (J) Japan, (K) Tottori Prefecture, Japan (L) New Zealand, and (M) Russia, (N) South Africa, (O) Quatar, (P) Switzerland, (Q) Bahrain, (R)Denmark, (S) Denmark, (T) Global data without China and Japan. The third wave of Omicron became small. (U) Global data without Australia, New Zealand, and Japan. The second wave of Omicron became reduced.

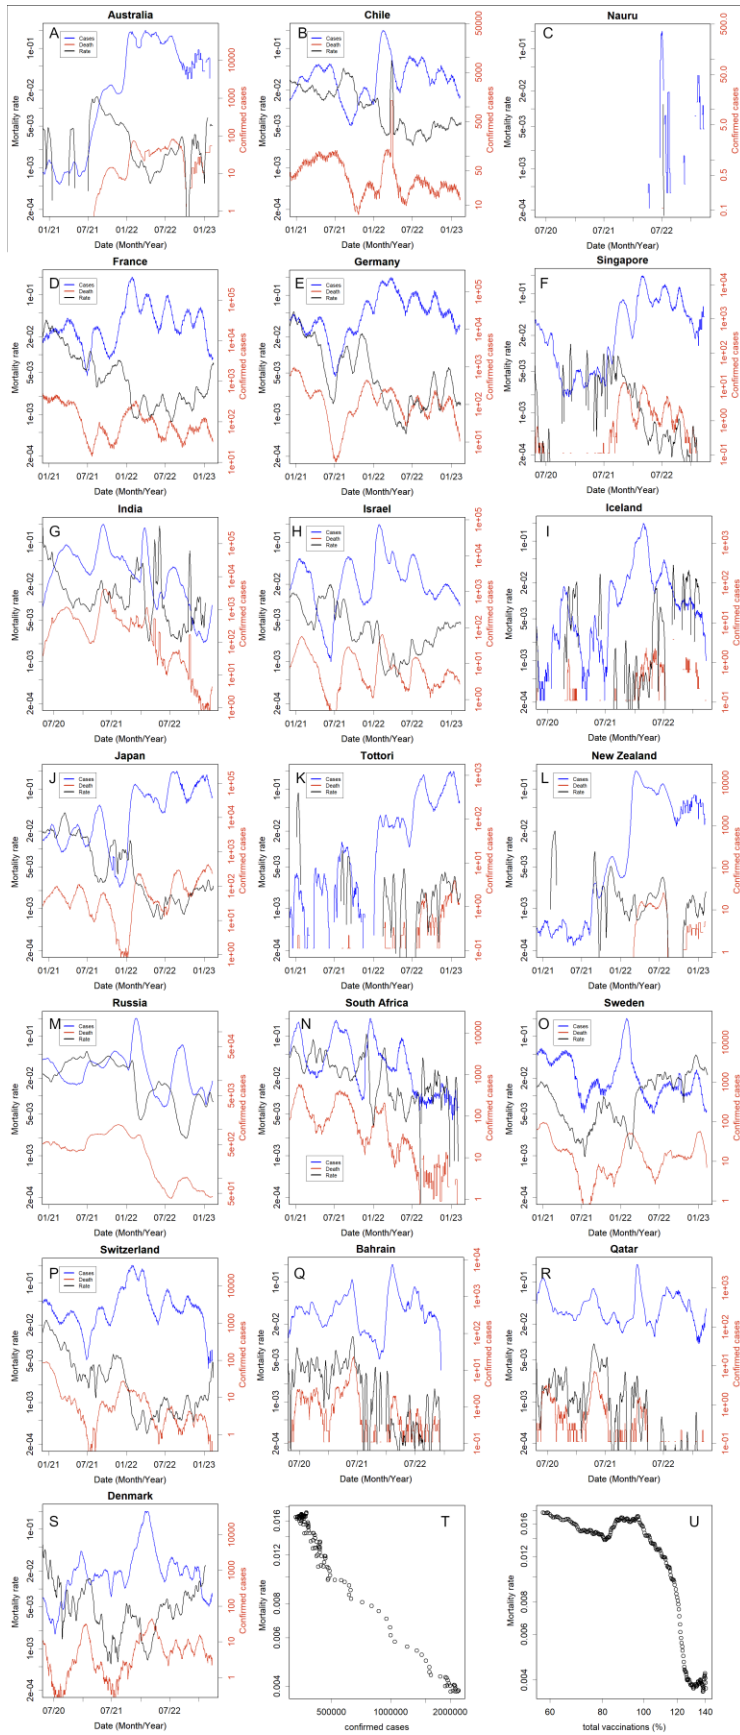

Fig. S2: Confirmed cases (blue), number of death (red), and mortality rate (black). (A) Australia, (B) Chile, (C) Nauru, (D) France, (E) Germany, (F) Singapore, (G), India, (H) Israel, (I) Iceland, (J) Japan, (K) Tottori Prefecture, Japan (L) New Zealand, and (M) Russia, (N) South Africa, (O) Quatar, (S) Denmark. (T) Confirmed cases vs mortality rate. (U) Vaccination vs mortality rate.

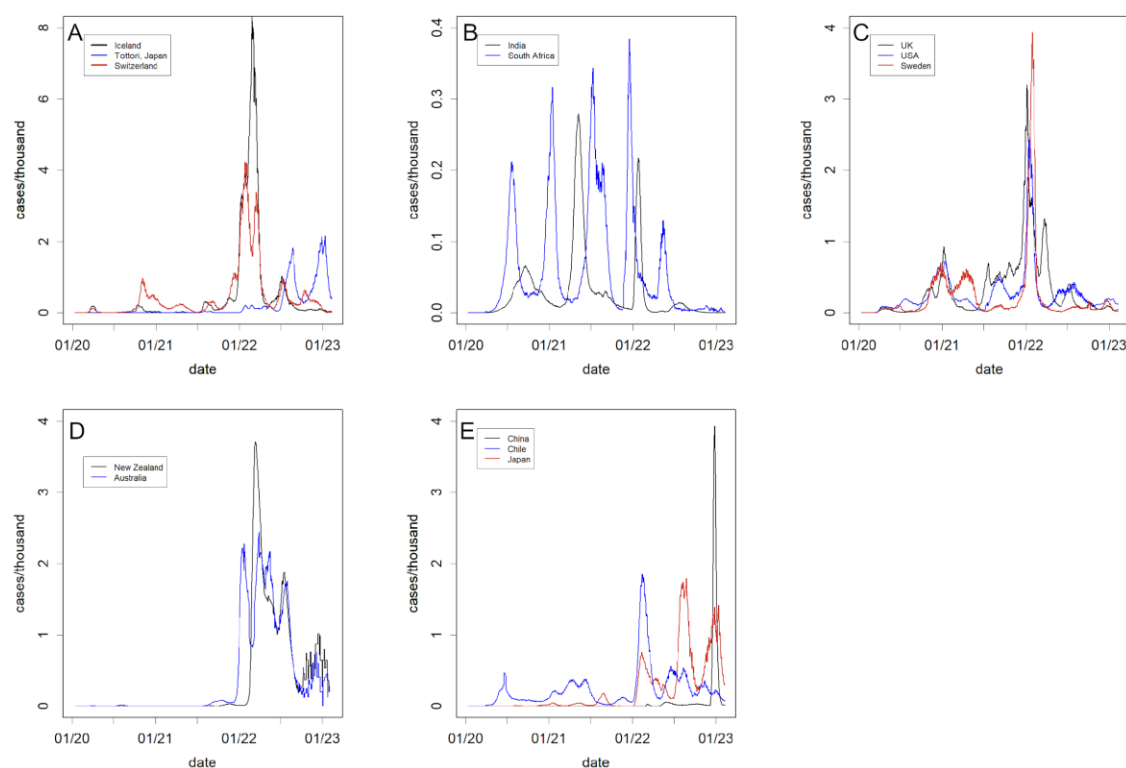

Fig. S3: Confirmed cases / 1000 people in an antilogarithm axis. (A) Iceland, Switzerland, and Tottori. Even in the successful countries, this could be as large as eight. (B) India and South Africa. The figures were quite low, indicating the small coverage of the survey. There have been no major epidemics in these countries for a while now. Probably many people in these countries are already infected once and hence immune, and another major epidemic is unlikely. (C) Sweden, UK, and USA. Omicron has caused a major epidemic and many people are probably immune. (D) Countries in Oceania. Very similar trends. (E) China, Chile, and Japan. The Omicron epidemic progressed slowly in three separate outbreaks in Japan and Chile because of self-defence. In China, by contrast, it spread quickly after the lockdown was lifted.

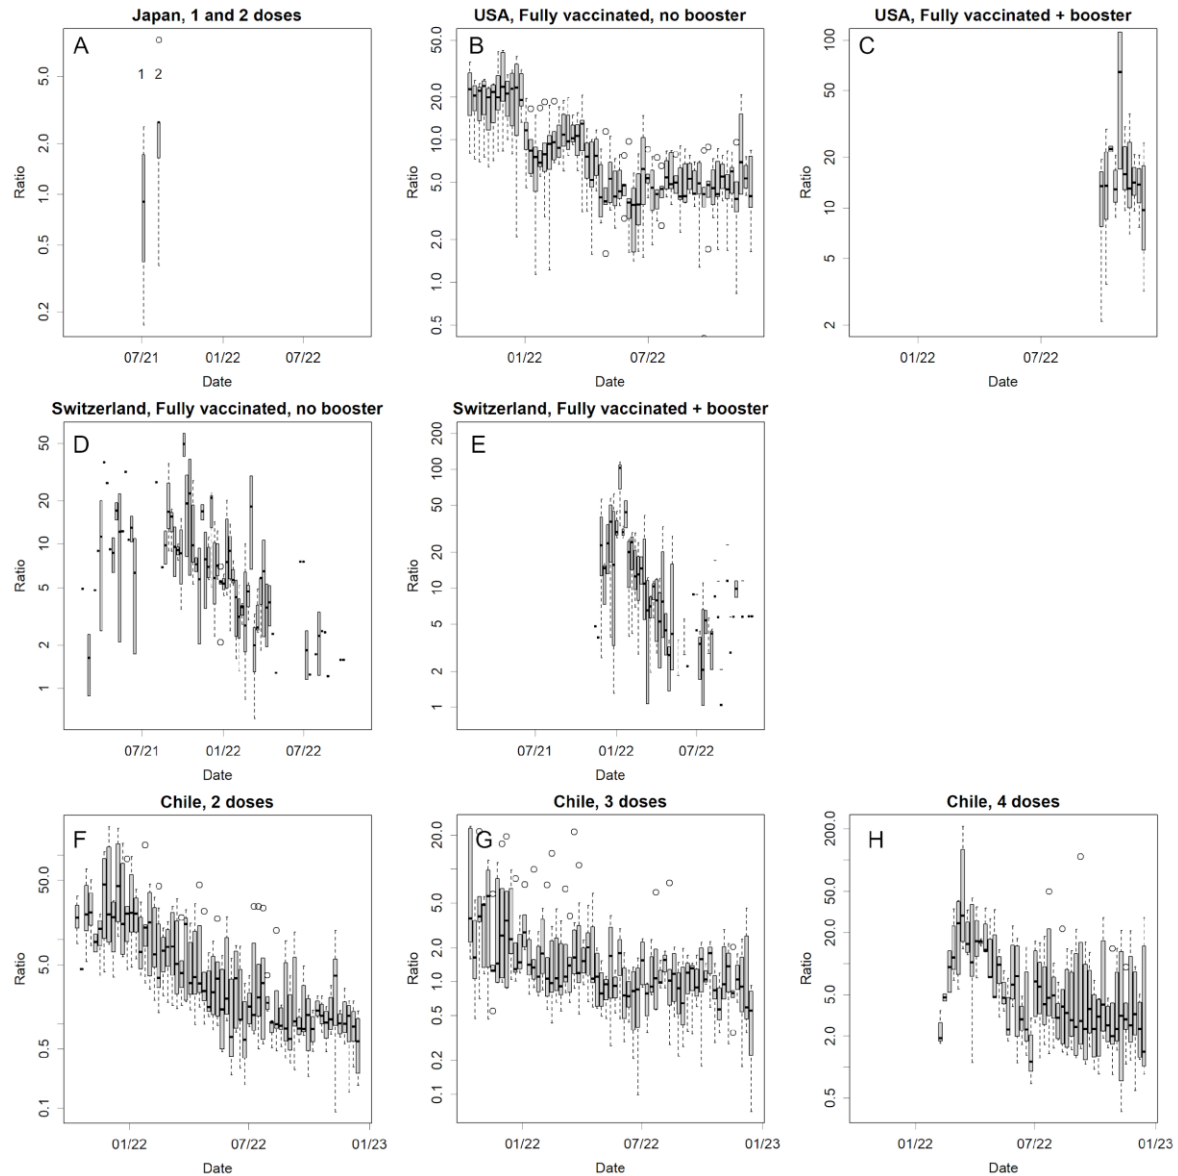

Fig. S4: Comparison of mortality rates with and without vaccination. (A) Japan: the data was published only once when Delta caused an epidemic. (B) and (C) USA: without and with booster, respectively. (D) and (E) Switzerland: Owing to the small number of deaths and lack of calculations, box plots have not been formed for recent data. (F, G, H) Chile: ratios between the indicated doses and (0 or 1) doses.

**Table S1: Mortality rate and Infection rate.** The mortality rate and number of deaths per infected person were calculated as the geometric mean from 2021/9/1 to 2023/2/1. Geometric mean was used because the mortality rate was log-normally distributed (Fig. 2B). The logarithm was taken and the z-scores were calculated and sorted. The infection rate is defined as the number of infected people per population. This was very low in many countries, probably because of the small number of tests conducted. A linear regression was estimated by excluding these countries. The Z-scores were calculated using the slope and intercept of the regression line.

**Table S2: Total vaccinations per 100 people at the presented date, total infected (%), and death (%) on 2023/02/10.** The infection and death rates were recorded for the entire population. Infections in South Africa and India were very low; however, it was assumed that many people in these countries became immune (Fig. S3B). This indicates that the survey was limited and probably not a random sample; therefore, the low mortality rates in these countries cannot be compared with other countries. China has stopped publishing deaths; therefore, this level should be considered up to the end of 2022. The value for Japan is at least six times higher.

## R- codes

```
##### Japan
```

```
# data uptake
```

```
JP <- read.table(file="JP.txt", sep="\t", header=TRUE)
```

```
JP<- as.matrix(JP)
```

```
number_patients <- as.numeric(JP[,5])
```

```
dates<- as.Date(JP[,1])
```

```
plot(dates, number_patients)
```

```
number_patients_av<- number_patients+NA
```

```
for(i in 5:1131){
```

```
number_patients_av[i] <- mean(number_patients[-4:4+i]) }
```

```
#### population: 1.257E8 (2021)
```

```
japan<- number_patients_av/1.257E8*1e4
```

```
as.numeric(JP[1135,6])/1.257E8
```

```
[1] 0.2615722
```

```
as.numeric(JP[1135,8])/1.257E8*1e3
```

```
[1] 0.5583532
```

```
# finding the values
```

```
#### K
```

```
K <- number_patients_av+NA
```

```
K[1:1128+4] <- (log2(number_patients_av[1:1128+7]) - log2(number_patients_av[1:1128]))/7
```

```
K[is.nan(K)] <- NA
```

```
K[is.infinite(K)] <- NA
```

```
K_av <- K*NA
```

```
for(i in 5:1131){
```

```
K_av[i] <- mean(K[-4:4+i], na.rm=T) }
```

```
dKdt<- number_patients+NA
```

```
dKdt[1:1128+4]<- (K_av[1:1128+7]-K_av[1:1128])/7
```

```

# dKdt
dKdt_av<- dKdt*0
for(i in 5:1131){
  dKdt_av[i] <- mean(dKdt[-4:4+i], na.rm=T) }

max(dKdt_av, na.rm=T)
min(dKdt_av, na.rm=T)

max(K_av, na.rm=T)
min(K_av, na.rm=T)

#death
number_death <- as.numeric(JP[,7])

number_death_av<- number_death+NA # moving average

for(i in 5:1131){
  number_death_av[i] <- mean(number_death[-4:4+i]) }

# death rate
death_rate <- number_death*NA

for(i in 1:1117+18){ # change the range of i appropriately
  death_rate[i] <- mean((number_death_av[1:1117+18]/number_patients_av[1:1117])[-4:4+i],
na.rm=T) }

#### making figures

## K
ylim=c(quantile(number_patients_av, 0.1, na.rm=T), quantile(number_patients_av, 1,
na.rm=T))+0.1

png(width=1000, height=1000, pointsize = 36, file="Japan.png")
par(lwd=2, mex=0.7, cex=1, mai=c(2,2,1,2))

plot(dates+3.5 , number_patients_av, pch=NA, xlim=c(as.Date("2021-01-01"), as.Date("2023-
02-5")), type="l", col="blue",lty=1, axes=F, ylab="", xlab="Date (Month/Year)", main="Japan" ,
ylim=ylim, log="y")
axis.Date(1, at = c("2020-01-01", "2020-07-01","2021-01-01","2021-07-01","2022-01-
01","2022-07-01","2023-01-01"),format = "%m/%y")

```

```

par(new=T)
box()
#abline(v=as.Date("2021-07-23"), lwd=2, col="green3")
axis(4, col.axis="blue")
par(new=T)
mtext("Confirmed cases", side=4, line=2.5, col="#d3381c")
par(new=T)

plot(dates+3.5, dKdt_av*5, axes=F, type="l", col="#d3381c", xlab="", ylab="",
xlim=c(as.Date("2021-01-01"), as.Date("2023-02-5")), ylim=c(-0.25, +0.45))
axis(2, col.axis="black")
#abline(h=0, col="red")

par(new=T)

plot(dates+3.5 , K_av, type="l", xlim=c(as.Date("2021-01-01"), as.Date("2023-02-5")),
ylim=c(-0.25, +0.45), axes=F, xlab="", ylab="")

mtext(expression(paste(italic(K), " and " )), side=2, line=3, at=0.05)
mtext(expression(paste( italic(K), ""))), side=2, line=3, at=0.12, col="#d3381c")

abline(h=0, lty=3, lwd=1)

legend(as.Date("2021-02-20"), 0.4, legend=c( "cases",
expression(italic(K)) ,expression(paste(italic(K), " x5"))),lty=c( 1,1),lwd=4, col=c( "blue",
"black" ,"#d3381c" ), cex=.6, box.lwd = 1)
dev.off()

## death
ylim=c(quantile(number_death_av, 0.1, na.rm=T), quantile(number_patients_av, 1,
na.rm=T))+0.1

png(width=1000, height=1000, pointsize = 36, file="JapanD.png")
par(lwd=2, mex=0.7, cex=1, mai=c(2,2,1,2))

plot(dates+3.5 , number_patients_av, pch=NA, xlim=c(as.Date("2021-01-01"), as.Date("2023-
02-5")), type="l", col="blue",lty=1, axes=F, ylab="", xlab="Date (Month/Year)", main="Japan" ,
ylim=ylim, log="y")

```

```

par(new=T)

plot(dates+3.5 , number_death_av, pch=NA, xlim=c(as.Date("2021-01-01"), as.Date("2023-
02-5")), type="l", col="#d3381c",lty=1, axes=F, ylab="", xlab="Date (Month/Year)",
main="Japan" , ylim=ylim, log="y")
axis.Date(1, at = c("2020-01-01", "2020-07-01","2021-01-01","2021-07-01","2022-01-
01","2022-07-01","2023-01-01"),format = "%m/%y")

axis(4, col.axis="#d3381c")
mtext("Confirmed cases", side=4, line=2.5, col="#d3381c")

par(new=T)
plot(dates[1:1:1117+18]+3.5 , death_rate[1:1:1117], pch=NA, xlim=c(as.Date("2021-01-01"),
as.Date("2023-02-5")), type="l", col="black",lty=1, axes=F, ylab="", xlab="", main="",
log="y", ylim=c(2E-4, 0.2))

axis(2)
mtext("Mortality rate", side=2, line=3, at=6e-3)
legend(as.Date("2021-02-20"), 0.19, legend=c( "Cases", "Death","Rate"),lty=c( 1,1),lwd=4,
col=c( "blue", "#d3381c" ,"black" ), cex=.6, box.lwd = 1)
box()

dev.off()

```
