# Supplementary material for: A Comparative Analysis of COVID-19 Response Measures and Their Impact on Mortality Rate
Source: MDPI journal article supplement (doi:10.3390/covid4020012), 2024-01-24
Supplement: s1 [file s1 › supplementTables.xlsx]

## Sheet: S1
Mortality and Infection Rates		Mortality				Infection Rate
Country_code	Country	population	Mortarity	log	z	2021-09-01	z	2023-02-01	z
CK	Cook_Islands	15040	0.000157972	-3.80142	-4.17004	0	-0.507937	0.466489	1.12583
NR	Nauru	11680	0.00021644	-3.66466	-3.84443	0	-0.507937	0.40137	0.901275
BI	Burundi	12837740	0.000320741	-3.49384	-3.43773	0.00100532	-0.491979	0.00416678	-0.46839
BT	Bhutan	770276	0.000343272	-3.46436	-3.36753	0.00337022	-0.454441	0.0812761	-0.202496
PM	Saint_Pierre_and_Miquelon	5888	0.000359414	-3.4444	-3.32001	0.00509511	-0.427062	0.579144	1.51429
BN	Brunei_Darussalam	445400	0.000597858	-3.2234	-2.79381	0.00608891	-0.411287	0.62152	1.66041
TO	Tonga	100179	0.000806353	-3.09347	-2.48446	0	-0.507937	0.16749	0.0947938
FO	Faroe_Islands	52337	0.000807894	-3.09265	-2.48249	0.0191834	-0.203439	0.662208	1.80072
SG	Singapore	5917600	0.000898148	-3.04665	-2.37298	0.0114269	-0.326557	0.374664	0.809185
BL	Saint_Barthélemy	10585	0.000938521	-3.02756	-2.32751	0.150402	1.87939	0.513085	1.2865
IS	Iceland	396960	0.000941629	-3.02612	-2.3241	0.0273957	-0.073084	0.525834	1.33046
KY	Cayman_Islands	71105	0.00110652	-2.95604	-2.15724	0.00956332	-0.356138	0.442613	1.04349
NZ	New_Zealand	5223100	0.00112171	-2.95012	-2.14314	0.00062932	-0.497947	0.409079	0.92786
VU	Vanuatu	301295	0.00117386	-2.93038	-2.09615	9.95702e-06	-0.507778	0.0398745	-0.34526
KR	Republic_of_Korea	51740000	0.00121079	-2.91693	-2.06412	0.00489834	-0.430185	0.583631	1.52976
PW	Palau	16733	0.00124269	-2.90564	-2.03723	0.000119524	-0.506039	0.357736	0.750815
AU	Australia	26461912	0.00139335	-2.85594	-1.91891	0.00203421	-0.475648	0.427384	0.990978
QA	Qatar	2656032	0.00163873	-2.78549	-1.75117	0.0876285	0.882991	0.18542	0.156621
MV	Maldives	382751	0.00166804	-2.77779	-1.73284	0.212412	2.86369	0.485211	1.19038
GG	Guernsey	64234	0.00175136	-2.75662	-1.68244	0.0201295	-0.18842	0.541287	1.38375
GL	Greenland	56865	0.00175424	-2.75591	-1.68074	0.00587356	-0.414705	0.210516	0.243159
WS	Samoa	205557	0.00183	-2.73755	-1.63702	4.86483e-06	-0.507859	0.0783676	-0.212526
RE	Réunion	860000	0.00188553	-2.72457	-1.60611	0.0585419	0.421299	0.574305	1.4976
CY	Cyprus	918100	0.00203527	-2.69138	-1.52709	0.12591	1.49064	0.699992	1.93101
DK	Denmark	5959464	0.00208895	-2.68007	-1.50017	0.0584269	0.419475	0.570484	1.48443
MN	Mongolia	3457548	0.00221599	-2.65443	-1.43913	0.0629756	0.491675	0.291499	0.522411
BH	Bahrain	1577059	0.00230387	-2.63754	-1.39891	0.172815	2.23516	0.441717	1.0404
JE	Jersey	103267	0.00234463	-2.62992	-1.38077	0.0904064	0.927086	0.642906	1.73416
AE	United_Arab_Emirates	9282410	0.00235594	-2.62784	-1.3758	0.0773905	0.720484	0.113054	-0.0929189
IL	Israel	9802400	0.00253444	-2.59612	-1.30028	0.109948	1.23727	0.488312	1.20108
JP	Japan	124340000	0.00253512	-2.596	-1.3	0.0119523	-0.318217	0.261645	0.419465
NO	Norway	5533582	0.00260806	-2.58368	-1.27067	0.0292543	-0.0435827	0.267077	0.438196
NL	Netherlands	17590000	0.00270611	-2.56765	-1.23251	0.110324	1.24324	0.487919	1.19972
MP	Northern_Mariana_Islands_(Commonwealth_of_the)	49480	0.00302322	-2.51953	-1.11793	0.00491108	-0.429983	0.270715	0.450743
IM	Isle_of_Man	90895	0.00305199	-2.51542	-1.10814	0.0733154	0.655799	0.418153	0.959148
AI	Anguilla	15701	0.00307113	-2.5127	-1.10167	0.0138208	-0.288559	0.248647	0.374643
XA	Bonaire	20100	0.003358	-2.47392	-1.00933	0.0874129	0.87957	0.489502	1.20518
AD	Andorra	83523	0.00339379	-2.46932	-0.99837	0.179986	2.34899	0.572764	1.49229
CH	Switzerland	8902308	0.00341428	-2.4667	-0.992146	0.0877362	0.884702	0.492744	1.21636
LA	Lao_People_s_Democratic_Republic	7443000	0.00355263	-2.44945	-0.951071	0.00201733	-0.475915	0.0292851	-0.381776
SC	Seychelles	100447	0.00366807	-2.43556	-0.918005	0.200384	2.67277	0.504395	1.25654
KI	Kiribati	120740	0.0038445	-2.41516	-0.869428	0	-0.507937	0.0414776	-0.339733
VN	Viet_Nam	100000000	0.00387268	-2.41199	-0.861878	0.00462092	-0.434589	0.115265	-0.0852932
KW	Kuwait	4670713	0.00392194	-2.4065	-0.848808	0.0877511	0.884937	0.141918	0.00661361
MF	Saint_Martin	72892	0.00394466	-2.40399	-0.842833	0.0460407	0.222869	0.168016	0.0966058
LU	Luxembourg	660809	0.00398109	-2.4	-0.833328	0.114646	1.31184	0.476234	1.15943
CN	China	1411750000	0.00400206	-2.39772	-0.827895	8.71741e-05	-0.506553	0.0697912	-0.242099
MU	Mauritius	1261041	0.00407785	-2.38957	-0.808498	0.00846602	-0.373555	0.233866	0.323677
AS	American_Samoa	49710	0.00412203	-2.38489	-0.797356	0	-0.507937	0.167371	0.0943819
AT	Austria	9129652	0.00424047	-2.37259	-0.768061	0.0743394	0.672054	0.633153	1.70053
MC	Monaco	39050	0.0043729	-2.35923	-0.736262	0.0819718	0.793204	0.411498	0.9362
GF	French_Guiana	294100	0.00444128	-2.35249	-0.720218	0.119255	1.38501	0.333315	0.666604
EE	Estonia	1365884	0.00444801	-2.35183	-0.718653	0.104381	1.1489	0.449495	1.06722
NC	New_Caledonia	268510	0.00447683	-2.34903	-0.711976	0.000506499	-0.499897	0.29787	0.544378
LI	Liechtenstein	39680	0.00452839	-2.34406	-0.700135	0.0858115	0.854151	0.538281	1.37338
FR	France	68184000	0.00458439	-2.33872	-0.687424	0.0963994	1.02221	0.563507	1.46037
XB	Sint_Eustatius	3242	0.0046073	-2.33655	-0.682271	0.00740284	-0.390431	0.37446	0.808483
FI	Finland	5563852	0.00461186	-2.33612	-0.681247	0.0230437	-0.142163	0.262464	0.422289
PT	Portugal	10467366	0.00465842	-2.33176	-0.670861	0.0987383	1.05934	0.531553	1.35018
DM	Dominica	67408	0.00468033	-2.32972	-0.666008	0.0242998	-0.122226	0.2338	0.323449
YT	Mayotte	270000	0.00476609	-2.32184	-0.647232	0.0734333	0.657672	0.155563	0.0536654
DE	Germany	84482267	0.00480734	-2.31809	-0.638321	0.0468997	0.236503	0.44726	1.05952
IE	Ireland	5281600	0.00482036	-2.31692	-0.635526	0.0666735	0.550374	0.322027	0.627679
MQ	Martinique	376500	0.0048236	-2.31663	-0.63483	0.0987835	1.06006	0.607586	1.61236
GP	Guadeloupe	397500	0.00528228	-2.27718	-0.540902	0.114196	1.3047	0.507431	1.267
GI	Gibraltar	34003	0.00542067	-2.26595	-0.514159	0.157104	1.98577	0.599918	1.58592
BB	Barbados	267800	0.00548256	-2.26102	-0.50242	0.0185512	-0.213474	0.396404	0.884152
VI	United_States_Virgin_Islands	87146	0.00548572	-2.26077	-0.501824	0.0672894	0.560149	0.281275	0.487156
PR	Puerto_Rico	3221789	0.00560615	-2.25134	-0.47937	0.0533638	0.339108	0.336259	0.676754
AW	Aruba	106739	0.00566892	-2.2465	-0.467857	0.13592	1.64953	0.412155	0.938465
TC	Turks_and_Caicos_Islands	46131	0.00572879	-2.24194	-0.456993	0.0574451	0.403891	0.141705	0.00587981
TL	Timor-Leste	1354662	0.00584301	-2.23336	-0.43658	0.0125057	-0.309433	0.0172848	-0.423156
BJ	Benin	12606998	0.00594074	-2.22616	-0.419426	0.00126374	-0.487877	0.0022202	-0.475103
SM	San_Marino	33881	0.0059689	-2.22411	-0.414538	0.158525	2.00834	0.691951	1.90328
TR	Türkiye	85279553	0.00619304	-2.2081	-0.376419	0.0749105	0.681118	0.199399	0.204825
GA	Gabon	2233272	0.00631044	-2.19994	-0.357001	0.011592	-0.323937	0.0219324	-0.40713
CW	Curaçao	152400	0.00641294	-2.19294	-0.34034	0.100151	1.08176	0.300348	0.552923
MS	Montserrat	4433	0.00650753	-2.18658	-0.3252	0.00654185	-0.404098	0.31649	0.608586
CV	Cabo_Verde	491233	0.00664466	-2.17753	-0.303636	0.0719699	0.634443	0.128715	-0.0389142
LV	Latvia	1882000	0.00671767	-2.17278	-0.292336	0.0760393	0.699037	0.518255	1.30433
UZ	Uzbekistan	36599764	0.00674324	-2.17113	-0.288407	0.00429336	-0.439788	0.00684666	-0.459149
TH	Thailand	68263022	0.00695061	-2.15798	-0.257088	0.0178652	-0.224362	0.0692466	-0.243977
DO	Dominican_Republic	10760028	0.0069789	-2.15621	-0.252889	0.0325439	0.00863293	0.0613621	-0.271165
TJ	Tajikistan	10077600	0.007028	-2.15317	-0.245639	0.00171192	-0.480763	0.0017649	-0.476673
KN	Saint_Kitts_and_Nevis	47195	0.00710116	-2.14867	-0.23493	0.0231169	-0.141002	0.139676	-0.00111789
SB	Solomon_Islands	734887	0.00710152	-2.14865	-0.234878	2.72151e-05	-0.507505	0.0334405	-0.367446
MT	Malta	519562	0.00710192	-2.14862	-0.23482	0.0697645	0.599437	0.225309	0.294169
BY	Belarus	9200617	0.00714964	-2.14572	-0.227895	0.0523369	0.322808	0.10804	-0.110206
GR	Greece	10482487	0.00715495	-2.14539	-0.227127	0.0560901	0.382383	0.55442	1.42904
SI	Slovenia	2117674	0.00729073	-2.13723	-0.207689	0.126579	1.50126	0.624211	1.66969
BE	Belgium	11772639	0.00732448	-2.13522	-0.202912	0.100066	1.08042	0.398796	0.8924
TG	Togo	8095498	0.00736324	-2.13293	-0.197455	0.00266333	-0.465661	0.00486134	-0.465995
RS	Serbia	6641197	0.00754094	-2.12257	-0.172796	0.114879	1.31554	0.372101	0.800349
CF	Central_African_Republic	5633412	0.00762373	-2.11783	-0.161506	0.00200731	-0.476074	0.00272783	-0.473352
UY	Uruguay	3566550	0.00762966	-2.11749	-0.160702	0.107885	1.20453	0.289554	0.515705
MY	Malaysia	33379500	0.00766069	-2.11573	-0.156504	0.0523152	0.322463	0.150889	0.0375476
LT	Lithuania	2866965	0.00769143	-2.11399	-0.152364	0.104708	1.15409	0.452359	1.0771
CU	Cuba	11089511	0.00769256	-2.11393	-0.152212	0.0588714	0.42653	0.100314	-0.136847
SS	South_Sudan	13249924	0.00772442	-2.11213	-0.147939	0.000863854	-0.494225	0.00138627	-0.477978
SE	Sweden	10557822	0.00773388	-2.1116	-0.146673	0.106706	1.18581	0.25521	0.397275
GB	The_United_Kingdom	67026292	0.00806167	-2.09357	-0.103749	0.103868	1.14076	0.362403	0.766906
SX	Sint_Maarten	42850	0.00814253	-2.08924	-0.0934303	0.0858576	0.854883	0.257036	0.403573
JO	Jordan	11302000	0.00818204	-2.08714	-0.0884254	0.0705296	0.611582	0.154574	0.0502557
PS	occupied_Palestinian_territory,_including_east_Jerusalem	4923000	0.00828703	-2.0816	-0.0752404	0.0754788	0.690139	0.142845	0.00981179
GU	Guam	170500	0.00833074	-2.07932	-0.0698009	0.0593548	0.434204	0.297308	0.542441
IT	Italy	58780965	0.00833224	-2.07924	-0.0696146	0.0772357	0.718028	0.433429	1.01182
CR	Costa_Rica	5262225	0.00837909	-2.0768	-0.0638174	0.0876331	0.883065	0.225413	0.294529
BM	Bermuda	64055	0.00844741	-2.07328	-0.0554198	0.0454453	0.213418	0.292967	0.527472
BW	Botswana	2410338	0.00853364	-2.06887	-0.0449184	0.0660974	0.541228	0.136684	-0.0114354
ES	Spain	48345223	0.00861161	-2.06492	-0.0355133	0.101164	1.09784	0.28403	0.496654
PF	French_Polynesia	279890	0.00861251	-2.06487	-0.0354049	0.143549	1.77062	0.278527	0.47768
GH	Ghana	30832019	0.0086785	-2.06156	-0.0275131	0.00390672	-0.445925	0.00554981	-0.463621
PA	Panama	4337406	0.00883196	-2.05394	-0.00938796	0.105371	1.16462	0.2374	0.335863
VG	British_Virgin_Islands	31538	0.00887854	-2.05166	-0.00394875	0.0814256	0.784533	0.231625	0.315949
LB	Lebanon	5490000	0.00900834	-2.04536	0.0110586	0.109702	1.23337	0.223796	0.288951
CZ	Czechia	10510000	0.00942263	-2.02583	0.0575532	0.161741	2.05939	0.436731	1.02321
CI	Côte_d’Ivoire	27480000	0.00952573	-2.0211	0.0688056	0.0020258	-0.475781	0.00320167	-0.471718
MZ	Mozambique	32419747	0.00967196	-2.01449	0.0845585	0.00451318	-0.436299	0.00718139	-0.457995
GE	Georgia	3736400	0.00976507	-2.01032	0.0944655	0.14819	1.84429	0.486283	1.19408
WF	Wallis_and_Futuna	11369	0.0100378	-1.99836	0.122944	0.0398452	0.124527	0.301434	0.556668
BZ	Belize	441471	0.0102474	-1.98939	0.14432	0.0367408	0.0752509	0.160056	0.069158
ER	Eritrea	3748902	0.0102758	-1.98818	0.14718	0.00177172	-0.479814	0.00271786	-0.473387
IQ	Iraq	43324000	0.0104495	-1.9809	0.164514	0.0435821	0.183843	0.0569094	-0.286519
ME	Montenegro	616695	0.0105129	-1.97828	0.170768	0.187136	2.46248	0.464325	1.11836
CA	Canada	40097761	0.0106986	-1.97067	0.188871	0.0373152	0.0843683	0.113488	-0.0914214
VE	Venezuela_(Bolivarian_Republic_of)	28302000	0.0107615	-1.96813	0.194932	0.0118134	-0.320422	0.0194877	-0.41556
GQ	Equatorial_Guinea	1558160	0.0110029	-1.95849	0.217876	0.00608217	-0.411394	0.0109828	-0.444887
RW	Rwanda	13246394	0.0110965	-1.95481	0.226631	0.00661516	-0.402934	0.0100473	-0.448113
SK	Slovakia	5426352	0.0111825	-1.95146	0.234615	0.0728154	0.647864	0.342936	0.69978
US	United_States_of_America	334233854	0.0113155	-1.94633	0.246844	0.116484	1.34101	0.301981	0.558554
AL	Albania	2761785	0.0114704	-1.94042	0.260897	0.0526229	0.327347	0.120655	-0.0667071
SA	Saudi_Arabia	32175224	0.0115367	-1.93792	0.266858	0.0169214	-0.239343	0.0257329	-0.394024
OM	Oman	5113071	0.0117027	-1.93171	0.281638	0.059123	0.430524	0.0781231	-0.213369
IN	India	1392329000	0.0119344	-1.9232	0.301902	0.0235654	-0.133882	0.0320922	-0.372096
NG	Nigeria	216783400	0.012034	-1.91959	0.310497	0.000887665	-0.493847	0.00122917	-0.47852
GN	Guinea	13261638	0.0120357	-1.91953	0.310645	0.00223238	-0.472502	0.00288351	-0.472815
DJ	Djibouti	1001454	0.012046	-1.91916	0.311527	0.0117329	-0.321699	0.0156672	-0.428734
NP	Nepal	29164578	0.0120983	-1.91728	0.316011	0.0262063	-0.0919639	0.034326	-0.364393
AZ	Azerbaijan	10151517	0.0121543	-1.91527	0.320788	0.0418549	0.156427	0.0815586	-0.201522
ZM	Zambia	19610769	0.0121557	-1.91522	0.320901	0.0105211	-0.340935	0.0173763	-0.42284
ST	Sao_Tome_and_Principe	223100	0.0122619	-1.91144	0.329903	0.0116898	-0.322384	0.0281488	-0.385694
VC	Saint_Vincent_and_the_Grenadines	110872	0.0123404	-1.90867	0.336498	0.0212407	-0.170782	0.086451	-0.184652
GD	Grenada	112579	0.0123753	-1.90744	0.339418	0.0040949	-0.442938	0.174811	0.120036
XK	Kosovo	1773971	0.0124414	-1.90513	0.344929	0.0817398	0.78952	0.153612	0.0469394
LY	Libya	6931061	0.0127175	-1.8956	0.367621	0.0445779	0.199649	0.0731723	-0.23044
FJ	Fiji	893468	0.0129106	-1.88905	0.383205	0.0522861	0.322002	0.0770257	-0.217153
MA	Morocco	37022000	0.0130156	-1.88554	0.391581	0.023255	-0.138809	0.0343644	-0.364261
KZ	Kazakhstan	20000000	0.0131567	-1.88085	0.40273	0.043179	0.177445	0.074831	-0.224721
AR	Argentina	46654581	0.0135448	-1.86823	0.432796	0.112789	1.28237	0.215137	0.259094
CL	Chile	19960889	0.0136298	-1.86551	0.43926	0.0820943	0.795147	0.256451	0.401554
LC	Saint_Lucia	178696	0.0138683	-1.85798	0.457198	0.0456362	0.216447	0.167223	0.0938708
HR	Croatia	3855641	0.0139162	-1.85648	0.460761	0.0970002	1.03175	0.32876	0.650896
BD	Bangladesh	169828911	0.0146265	-1.83486	0.512236	0.00885409	-0.367395	0.0119978	-0.441387
KG	Kyrgyzstan	7100000	0.0146517	-1.83411	0.514022	0.0247713	-0.114742	0.0290975	-0.382423
PG	Papua_New_Guinea	11781559	0.0147624	-1.83084	0.521806	0.00154411	-0.483427	0.00396891	-0.469073
CD	Democratic_Republic_of_the_Congo	95370000	0.0153408	-1.81415	0.561544	0.00057991	-0.498732	0.00100224	-0.479303
ET	Ethiopia	107334000	0.0154025	-1.81241	0.565693	0.0028708	-0.462368	0.00465399	-0.46671
CG	Congo	6106869	0.0156026	-1.8068	0.57904	0.00223191	-0.472509	0.00410521	-0.468603
CM	Cameroon	28088845	0.0159521	-1.79718	0.601945	0.00299799	-0.460349	0.00441431	-0.467537
MR	Mauritania	4475683	0.015996	-1.79599	0.604788	0.00750277	-0.388845	0.0141737	-0.433884
PH	Philippines	112892781	0.0160575	-1.79432	0.608754	0.017625	-0.228174	0.0360807	-0.358342
SL	Sierra_Leone	8494260	0.016171	-1.79126	0.616043	0.000749565	-0.496039	0.000913558	-0.479608
NI	Nicaragua	6733763	0.0162185	-1.78999	0.619076	0.00137858	-0.486054	0.0023155	-0.474774
AG	Antigua_and_Barbuda	100772	0.0162628	-1.7888	0.621896	0.0170186	-0.2378	0.0903624	-0.171164
KE	Kenya	51526000	0.0168634	-1.77305	0.659396	0.00457755	-0.435277	0.00665328	-0.459816
SR	Suriname	616500	0.0170015	-1.76951	0.667825	0.0469862	0.237876	0.133041	-0.0239953
BF	Burkina_Faso	22185654	0.018171	-1.74062	0.736614	0.000621933	-0.498065	0.000992759	-0.479335
GY	Guyana	743699	0.0182365	-1.73906	0.740338	0.0341576	0.0342482	0.0980531	-0.144644
GT	Guatemala	17602431	0.0186132	-1.73018	0.761481	0.0267166	-0.0838636	0.0697087	-0.242384
AO	Angola	33086278	0.0186741	-1.72876	0.764857	0.00143697	-0.485127	0.00317908	-0.471796
PL	Poland	37691000	0.0190467	-1.72018	0.785285	0.0766887	0.709344	0.169277	0.100955
KM	Comoros	758316	0.0191504	-1.71782	0.790899	0.00536452	-0.422785	0.0118579	-0.441869
IR	Iran_(Islamic_Republic_of)	84038000	0.0192614	-1.71531	0.796875	0.0594024	0.43496	0.0900111	-0.172376
SZ	Eswatini	1223362	0.0193629	-1.71303	0.802312	0.0354523	0.0547985	0.0605978	-0.273801
PK	Pakistan	241499431	0.0196003	-1.70774	0.814911	0.00480382	-0.431685	0.00652711	-0.460251
RU	Russian_Federation	146424729	0.0198075	-1.70317	0.825785	0.0473782	0.244098	0.149966	0.0343647
AM	Armenia	2981200	0.0200224	-1.69848	0.836944	0.0814269	0.784555	0.149716	0.0335019
BR	Brazil	203062512	0.0201966	-1.69472	0.845901	0.102197	1.11423	0.181263	0.142288
GW	Guinea-Bissau	1781308	0.0202758	-1.69302	0.849949	0.00327231	-0.455995	0.00502271	-0.465439
LS	Lesotho	2306000	0.0205311	-1.68759	0.862889	0.00670425	-0.40152	0.0149566	-0.431184
MD	Republic_of_Moldova	2615000	0.0211138	-1.67543	0.891825	0.102304	1.11594	0.228903	0.306562
MG	Madagascar	26923353	0.0212258	-1.67314	0.897297	0.00159241	-0.48266	0.00251926	-0.474072
RO	Romania	19051562	0.0213644	-1.67031	0.904024	0.0576732	0.407511	0.174527	0.119058
BO	Bolivia_(Plurinational_State_of)	12006031	0.0214041	-1.6695	0.905947	0.0408517	0.140503	0.0989491	-0.141555
UA	Ukraine	41130432	0.0214566	-1.66844	0.908478	0.0556369	0.375189	0.130636	-0.0322906
UG	Uganda	42885900	0.0215629	-1.66629	0.913591	0.00280297	-0.463445	0.00397112	-0.469065
ZW	Zimbabwe	15178979	0.0217561	-1.66242	0.922812	0.00822012	-0.377458	0.0172978	-0.423111
JM	Jamaica	2825544	0.0221782	-1.65407	0.94268	0.0241125	-0.125198	0.0543715	-0.295271
TZ	United_Republic_of_Tanzania	61741120	0.0222287	-1.65309	0.945034	0.000406261	-0.501488	0.000691014	-0.480376
KH	Cambodia	17091464	0.0222894	-1.6519	0.947856	0.00544453	-0.421515	0.00811475	-0.454777
SV	El_Salvador	6884888	0.0223921	-1.6499	0.952607	0.0136618	-0.291082	0.0293084	-0.381695
BS	Bahamas	397360	0.0224827	-1.64815	0.956781	0.046142	0.224477	0.0943502	-0.157413
SN	Senegal	18275743	0.0224941	-1.64793	0.957305	0.0039837	-0.444703	0.00486448	-0.465985
CO	Colombia	52215503	0.0225635	-1.64659	0.960494	0.093981	0.983825	0.121732	-0.0629924
ML	Mali	22395489	0.0233333	-1.63202	0.995179	0.000664821	-0.497384	0.00146382	-0.477711
HU	Hungary	9597085	0.0234391	-1.63006	0.999858	0.0846644	0.835942	0.228449	0.304997
TT	Trinidad_and_Tobago	1365805	0.0234693	-1.6295	1.00119	0.0326591	0.0104623	0.137344	-0.00915893
HN	Honduras	9745149	0.0247144	-1.60705	1.05464	0.0347616	0.043835	0.0483068	-0.316183
LK	Sri_Lanka	22037000	0.0249415	-1.60308	1.0641	0.0201538	-0.188034	0.0304937	-0.377608
ID	Indonesia	279118866	0.0251141	-1.60008	1.07123	0.0146896	-0.274769	0.0241126	-0.399612
ZA	South_Africa	62027503	0.0254586	-1.59417	1.08532	0.0447811	0.202874	0.0653848	-0.257294
DZ	Algeria	45400000	0.0256082	-1.59162	1.09138	0.00431894	-0.439382	0.00597749	-0.462147
TD	Chad	17414717	0.0257794	-1.58873	1.09827	0.000286654	-0.503386	0.000439398	-0.481243
HT	Haiti	11743017	0.0258213	-1.58802	1.09995	0.00179417	-0.479458	0.00290181	-0.472752
TN	Tunisia	11850232	0.0260573	-1.58407	1.10936	0.0562156	0.384375	0.0970746	-0.148019
PY	Paraguay	6109644	0.0277017	-1.55749	1.17263	0.0750379	0.683142	0.120123	-0.0685424
MK	North_Macedonia	1832696	0.0285552	-1.54432	1.20401	0.0967967	1.02852	0.189084	0.169254
GM	Gambia	2417471	0.0301407	-1.52085	1.25989	0.00402735	-0.44401	0.00520627	-0.464806
MW	Malawi	21507723	0.0305178	-1.51545	1.27275	0.00281266	-0.463291	0.00411303	-0.468576
BG	Bulgaria	6447710	0.0307693	-1.51188	1.28123	0.0706828	0.614012	0.200913	0.210043
MM	Myanmar	55770232	0.031513	-1.50151	1.30593	0.00721962	-0.393339	0.0113651	-0.443569
NE	Niger	25369415	0.0338002	-1.47108	1.37838	0.000230869	-0.504272	0.000374861	-0.481466
EC	Ecuador	16938986	0.0372012	-1.42944	1.47752	0.0295886	-0.0382761	0.0621057	-0.268601
LR	Liberia	5248621	0.0380408	-1.41975	1.5006	0.00109152	-0.490611	0.0015364	-0.477461
AF	Afghanistan	34262840	0.0408676	-1.38862	1.57471	0.00447307	-0.436935	0.00608549	-0.461774
BA	Bosnia_and_Herzegovina	3277082	0.0409989	-1.38723	1.57803	0.0652571	0.527891	0.122485	-0.0603949
EG	Egypt	105595000	0.0481109	-1.31776	1.74344	0.00273158	-0.464578	0.00488289	-0.465921
MX	Mexico	129202482	0.0489223	-1.31049	1.76073	0.0266373	-0.0851219	0.0571119	-0.285821
SO	Somalia	18143379	0.0504362	-1.29726	1.79224	0.000962665	-0.492656	0.00150567	-0.477567
PE	Peru	33396698	0.0548722	-1.26065	1.87941	0.0643654	0.513736	0.134184	-0.0200565
SY	Syrian_Arab_Republic	22923000	0.0557429	-1.25381	1.89569	0.00121777	-0.488607	0.00250504	-0.474121
SD	Sudan	41984500	0.0786052	-1.10455	2.25107	0.000899832	-0.493653	0.00151851	-0.477522
YE	Yemen	31888698	0.181034	-0.742241	3.11371	0.000246765	-0.50402	0.000374584	-0.481467

## Sheet: S2
Vaccination
Nation	Vaccinations (%)	Date	Infected (%)	Deth (%)
Australia	253.1	2023-01-04	44	0.069
China	235.6	2022-11-29	7	0.008
Chile	336.7	2023-01-27	26.3	0.328
France	234	2023-01-22	56.8	0.237
Germany	232	2023-01-22	45.5	0.2
Iceland	237.6	2023-01-08	56.1	0.064
India	159.8	2023-01-31	3.1	0.037
Israel	173.6	2022-06-05	51.1	0.131
Japan	298.9	2023-02-13	26.2	0.055
Tottori, Japan	297.5	2023-02-13	23.7	0.044
New Zealand	248.3	2023-01-20	41.9	0.048
Netherlands	207.4	2022-09-11	49	0.131
Russia	126.3	2023-01-19	15.4	0.276
South Africa	64.2	2022-12-25	6.8	0.172
Sweden	225.8	2023-01-22	25.9	0.226
Switzerland	193.2	2023-01-22	50.7	0.161
UK	222.8	2022-09-11	36.1	0.305
USA	199.7	2023-01-27	30.2	0.329
